# Supplementary material for: A Sensor-Based Drone for Pollutants Detection in Eco-Friendly Cities: Hardware Design and Data Analysis Application
Source: MDPI journal article supplement (doi:10.3390/electronics11010052), 2021-12-24
Supplement: s1 [file s1]

**Table S1.** Summarizing table with threshold values of the main polluting species, issued by provided by the WHO (World Health Organization) [28].

| Pollutant       | WHO guideline values                                                                   |
|-----------------|----------------------------------------------------------------------------------------|
| PM2.5           | 10 $\mu\text{g}/\text{m}^3$ (annual mean)<br>25 $\mu\text{g}/\text{m}^3$ (daily limit) |
| PM10            | 20 $\mu\text{g}/\text{m}^3$ (annual mean)<br>50 $\mu\text{g}/\text{m}^3$ (daily limit) |
| NO <sub>2</sub> | 0.2 ppm (1-hour limit)<br>0.04 ppm (annual mean)                                       |
| NH <sub>3</sub> | 25 ppm TWA (Time Weighted Average)<br>35 ppm STEL (Short Term Exposure Limit)          |
| VOC             | 111 ppb (daily limit)                                                                  |
| CO              | 8.11 ppm (daily limit)                                                                 |
| CO <sub>2</sub> | 880 ppm (daily limit)                                                                  |

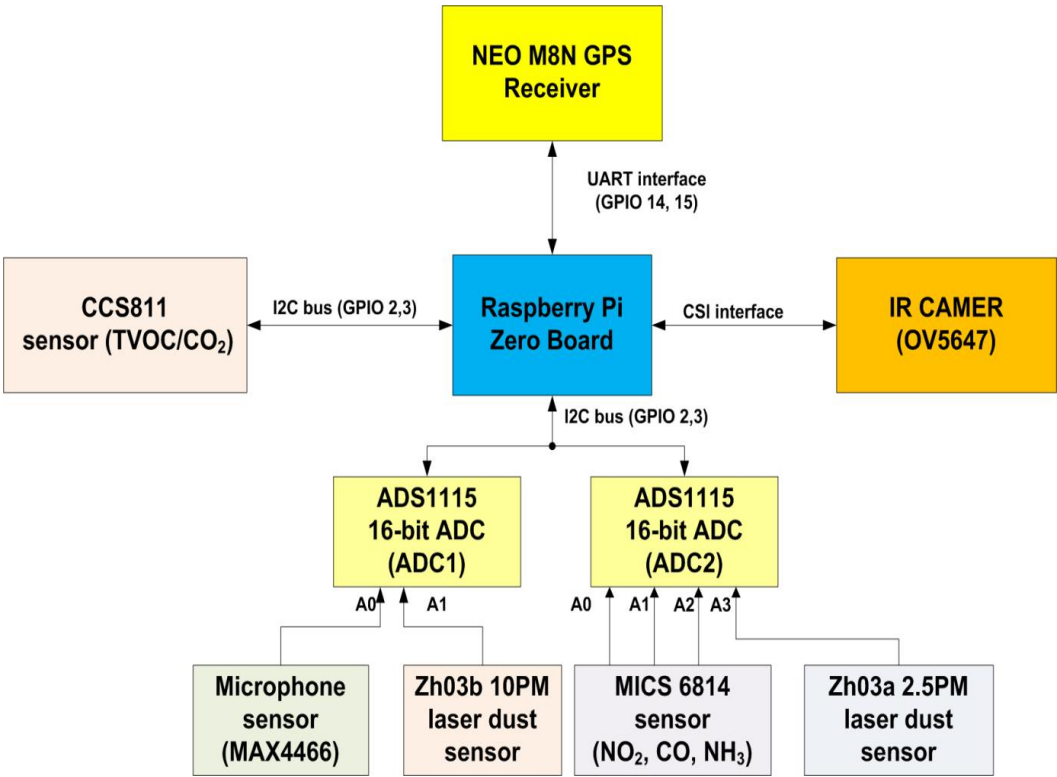

**Figure S1.** Block diagram of the electronic section for the environmental pollutants monitoring.
